# Supplementary material for: Photoelectrochemical performance of facet-controlled TiO2 nanosheets grown hydrothermally on FTO
Source: Royal Society of Chemistry journal article supplement (doi:10.1039/d0na01017k), 2020-12-21
Supplement: d0na01017k1.pdf [file d0na01017k1.pdf]

## Supporting Information

### Photoelectrochemical performance of facet-controlled TiO<sub>2</sub> nanosheets grown hydrothermally on FTO

Fahimeh Shahvaranfard,<sup>a,#</sup> Gihoon Cha,<sup>a,#</sup> Nikita Denisov,<sup>a,#</sup> Benedict Osuagwu,<sup>a</sup>

Patrik Schmuki<sup>a,b,c\*</sup>

<sup>a</sup> Institute for Surface Science and Corrosion WW4-LKO, Department of Materials Science and Engineering, University of Erlangen-Nuremberg, Martensstrasse 7, 91058 Erlangen, Germany

<sup>b</sup> Chemistry Department, Faculty of Sciences, King Abdulaziz University, 80203 Jeddah, Kingdom of Saudi Arabia

<sup>c</sup> Regional Centre of Advanced Technologies and Materials, Palacky University Olomouc, 17. listopadu 50A, 772 07 Olomouc, Czech Republic

# These authors contributed equally to this work.

\* Corresponding Author. E-mail: [schmuki@ww.uni-erlangen.de](mailto:schmuki@ww.uni-erlangen.de)

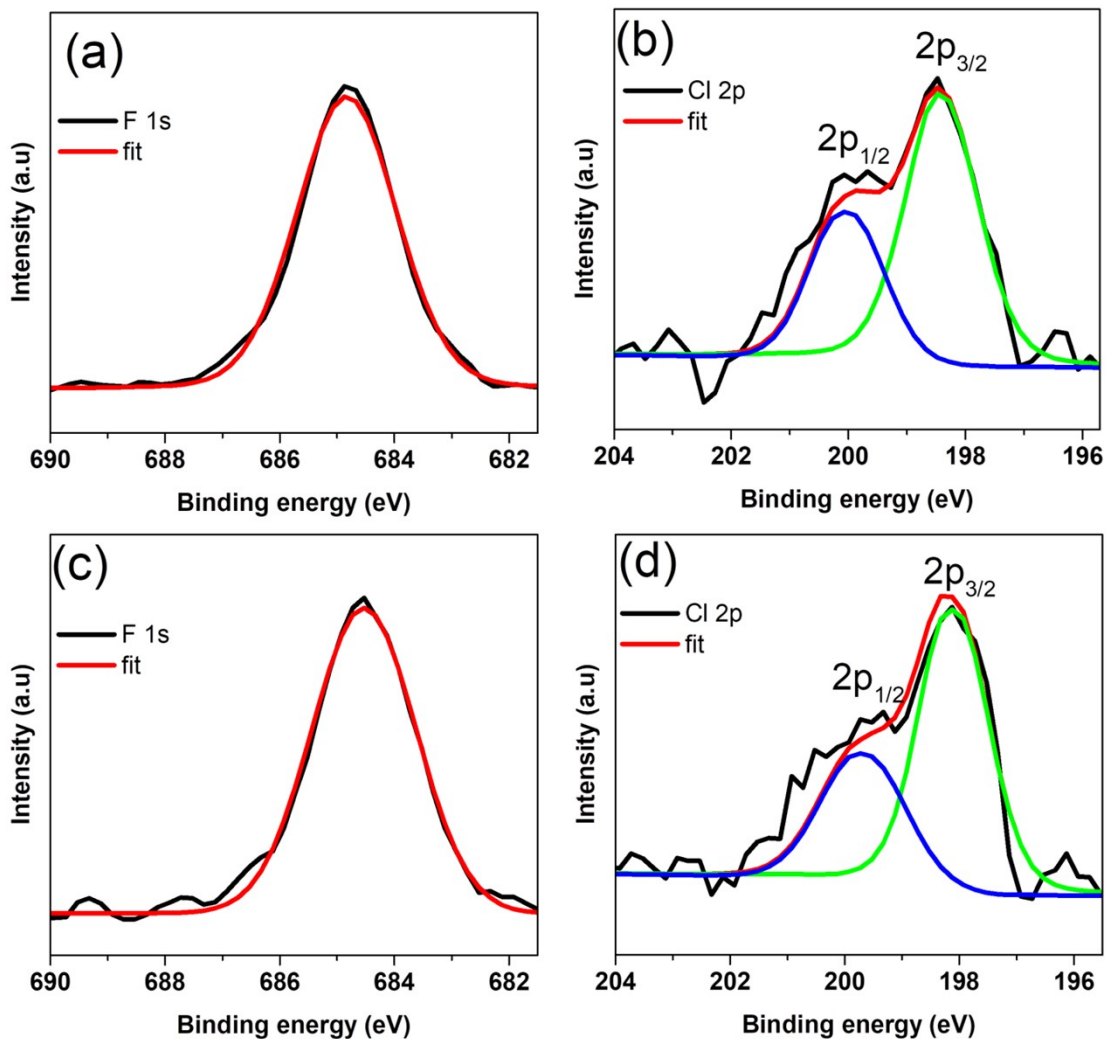

(e) at% (XPS)

| Sample       | Ti    | O     | C     | Sn   | F    | Cl   |
|--------------|-------|-------|-------|------|------|------|
| HCl/DI:30/30 | 25.38 | 56.44 | 10.13 | 0.12 | 7.58 | 0.34 |
| HCl/DI:33/27 | 22.13 | 56.16 | 15.43 | 0.61 | 4.96 | 0.71 |

**Fig. S1.** XPS spectra for (a) F 1s and (b) Cl 2p region of samples grown with the basic recipe (a,b), and of sample grown with higher concentration of HCl (HCl to DI of 33:27), (c,d) and

surface atomic concentration determined from XPS data (e). Evident is a different level of fluoride termination for the two samples but only a very weak influence of chloride.

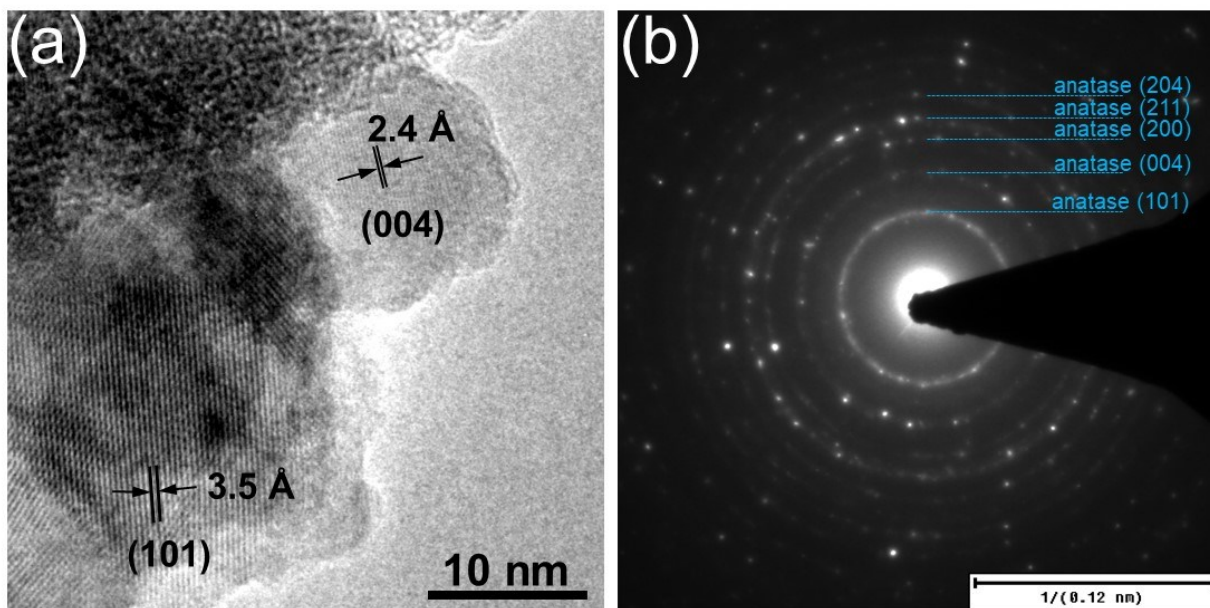

**Fig. S2.** HR-TEM image (a) and the corresponding SAED pattern (b) for the anatase TiO<sub>2</sub> nanosheets grown by hydrothermal treatment using the basic recipe at 150 °C for 15 h.

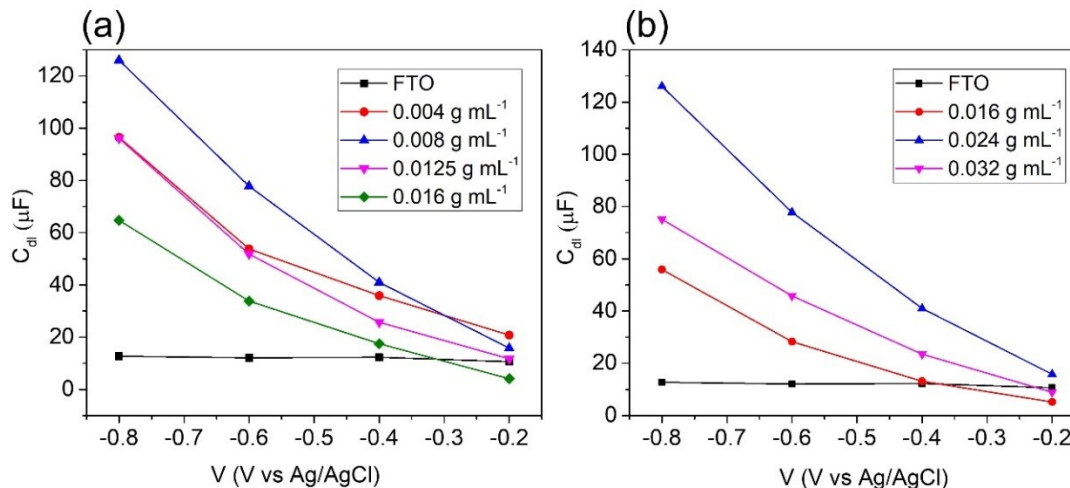

(c)

| Sample                          | $R_s$<br>( $\Omega$ ) | $R_{ct}$<br>( $k\Omega$ ) | CPE                     |      | Normalized<br>Surface<br>Area* |
|---------------------------------|-----------------------|---------------------------|-------------------------|------|--------------------------------|
|                                 |                       |                           | $C_{dl}$<br>( $\mu F$ ) | a    |                                |
| <b>FTO</b>                      | 83                    | 252                       | 12.3                    | 0.97 | 0.3                            |
| <b>0.004 g mL<sup>-1</sup></b>  | 109                   | 64                        | 35.9                    | 0.95 | 0.9                            |
| <b>0.008 g mL<sup>-1</sup></b>  | 119                   | 243                       | 41                      | 0.96 | 1                              |
| <b>0.0125 g mL<sup>-1</sup></b> | 139                   | 146                       | 25.7                    | 0.93 | 0.6                            |
| <b>0.016 g mL<sup>-1</sup></b>  | 330                   | 530                       | 17.5                    | 0.96 | 0.4                            |

$$*A/A_0 = C/C_0$$

(d)

| Sample                         | $R_s$<br>( $\Omega$ ) | $R_{ct}$<br>( $k\Omega$ ) | CPE                     |      | Normalized<br>Surface<br>Area* |
|--------------------------------|-----------------------|---------------------------|-------------------------|------|--------------------------------|
|                                |                       |                           | $C_{dl}$<br>( $\mu F$ ) | a    |                                |
| <b>FTO</b>                     | 83                    | 252                       | 12.3                    | 0.97 | 0.3                            |
| <b>0.016 g mL<sup>-1</sup></b> | 620                   | 509                       | 13.1                    | 0.96 | 0.3                            |
| <b>0.024 g mL<sup>-1</sup></b> | 119                   | 243                       | 41                      | 0.96 | 1                              |
| <b>0.032 g mL<sup>-1</sup></b> | 97                    | 906                       | 23.5                    | 0.96 | 0.6                            |

$$*A/A_0 = C/C_0$$

**Fig. S3** Double layer capacitance as a function of voltage for TiO<sub>2</sub> nanosheets for (a) different concentrations of F precursor, (b) different concentrations of Ti precursor (c) Impedance parameters at -0.4 V for TiO<sub>2</sub> nanosheets at different concentrations of F precursor, (d) Impedance parameters at -0.4 V for TiO<sub>2</sub> nanosheets at different concentrations of Ti precursor.

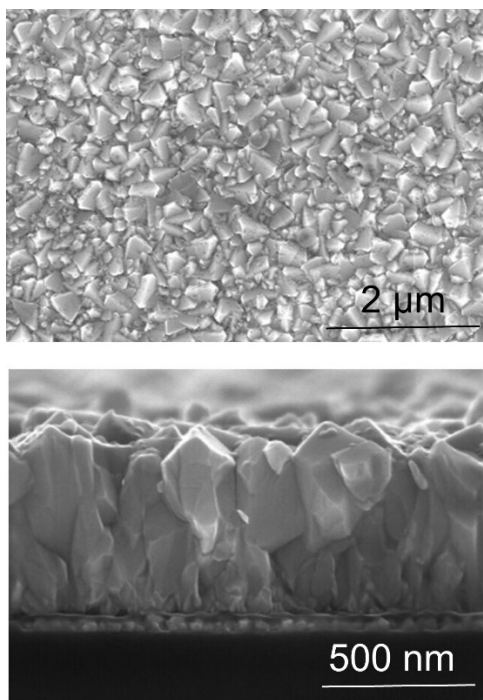

**Fig. S4** Top view and cross-sectional SEM images of TiO<sub>2</sub> nanosheets grown on FTO at HCl to DI water: 40/20.

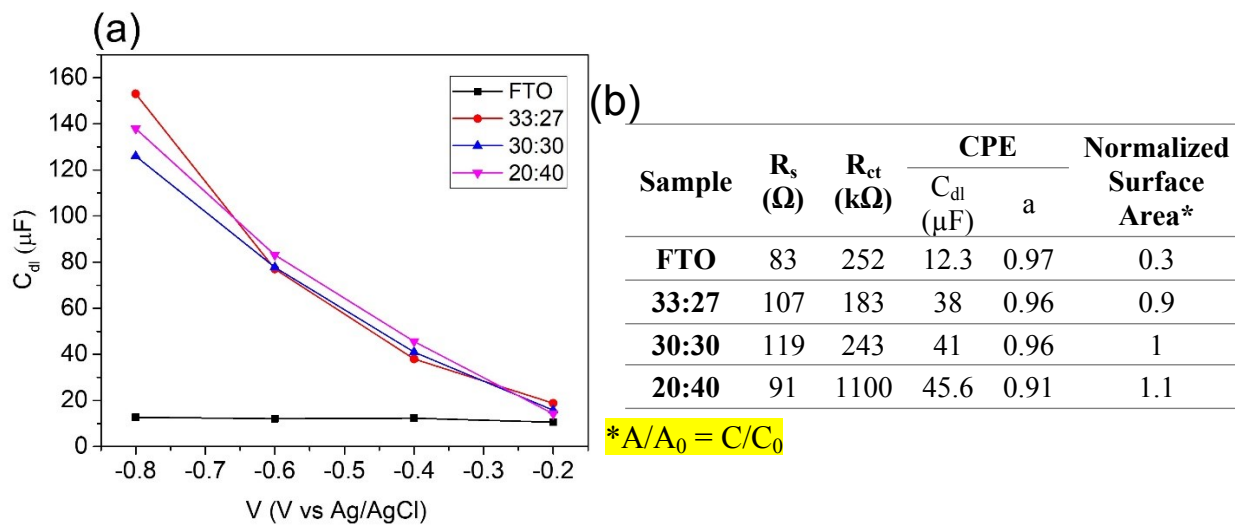

**Fig. S5** (a) Double layer capacitance as a function of voltage for  $TiO_2$  nanosheets grown with different ratios of HCl to DI water, (b) Impedance parameters at -0.4 V.
